# Supplementary material for: Selection and Verification of Standardized Reference Genes of Angelica dahurica under Various Abiotic Stresses by Real-Time Quantitative PCR
Source: MDPI journal article supplement (doi:10.3390/genes15010079), 2024-01-07
Supplement: s1 [file s1]

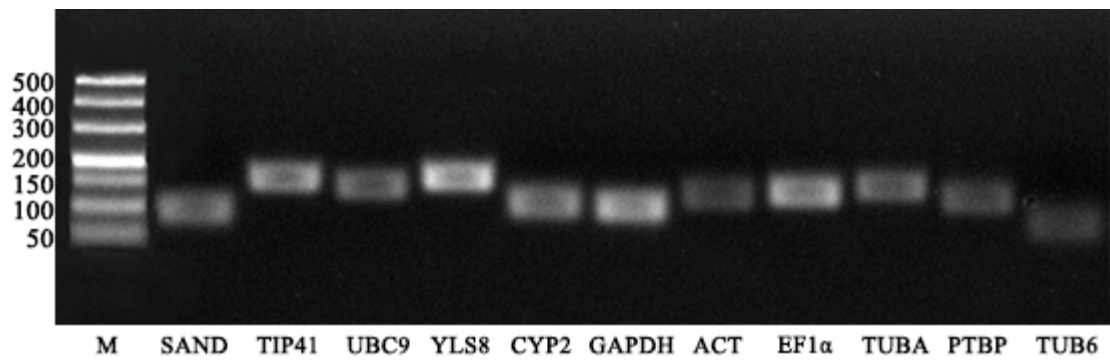

**Figure S1.** Agarose gel (1.0 %) electrophoresis showing amplification of a specific PCR product of the expected size for each gene. M represents a 500 bp DNA marker.

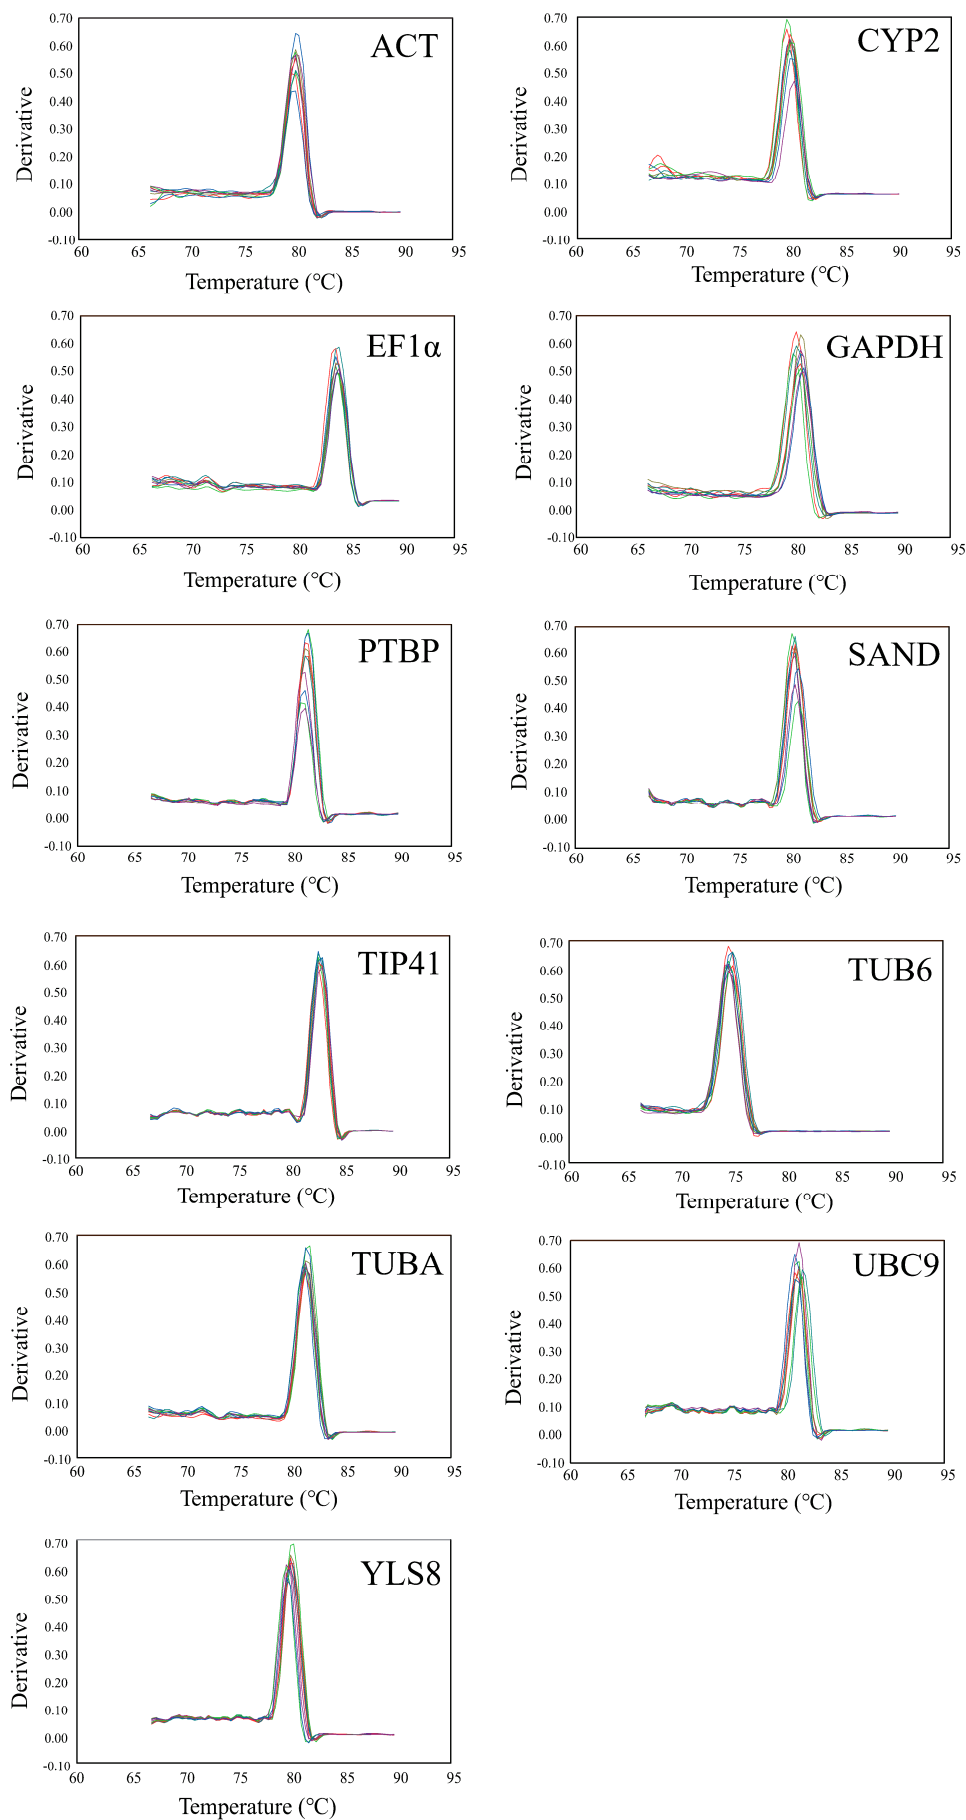

**Figure S2.** Melting curves of 11 candidate reference genes tested in this study.

**Table S1.** Information of all candidate genes and target gene in *A. dahurica*.

**Gene abbreviation-** *SAND*. **Gene ID-** TRINITY\_DN30497\_c0\_g1\_i3

**Gene sequence-**

CTGGCGGTACATTAACAATTCAGGTGCTTCTATTGCAATATTGCAAAATTGTAGGTTGGCCTCAATGAA  
ATATACCTAGAGATGGATTACAGACTTAGCATACAAACATACAGTAAATGACAAATACATCTGATGA  
TACATTCAACGAACATAAGGATTGATATATTATGATCGGCATAATCTTGCTGTGTTAGAACCTTGTTT  
AAAAATCAAACTAGTATACATGAATAACATACTTTTCTGGAAACATCACCATGAAAAGGGGCTTGCT  
CCCAACAAAAAACTTCATTTTCCACATCTTTAACCCATTGGCATACTCGGTTGCATGTCTTTATAGCC  
AGTGCCTTGTCTGCTAGAGGATCAAATGCTGCATAAAGTTCAAAATCCTGAGTAACCCAGCAGAGTAT  
AACATAGTTCTCATCCCTTCTAAACTGGGTTTTGTGAGGACCAAGTTCTCTATCATGCATAGAAGTATA  
CAGCTTCTGATATGCTCTATATAATCTTTTCTGTTGTTTAGGGGTGTTGATCGGTGATGAGAACTCAGAA  
GATACATATTGATCTAGATACATACTGCGGTAAACGAAGTGCCAAAGCCCAGCAGGACCACCTAACAA  
GTGCCTTACACCTATCTGCGGAGTCCAGTGGAGGTCTAGGCTGACCTAAATGAGATGACAAAGATCCC  
GAGCGAGGAGATGGATTAACAGGCAAATCTTCGACACGCATGCCACCATCCAACATCGACCTTTGAG  
CTTCATTAAGAACATTTGACTTCAGAAGGACCATTTCGATACGGATCCTCCAATCTTTTAGACGATGAA  
ATGCATCAGGATTAGCAGTAAGCAACATCAAATATGTATCAGCATCAAGATAATACACATAACTATAT  
AAAAATGCCATTGGATTGTATCTCGGCAGACAGATTGGAGAGAAAGATTCAGATGTCTCTGAATGATTC  
AGATGACATCACAAAGTTGGCAAGCAAAAGCATATCATCAGGATGAAGAGATGCTTTTTGTGCACCA  
ACCAGACTGATGACCTTGTGTTTACACATTAATATCGGAAGAGGACACCTGACTCAGCAACATCCTG  
CAATATGGCACCGGCGGCTTGCCTTGTGGATAAGCAAGGGGAAGACAAGAGTAGGCATGAAGAAA  
AGTGGCAGGGTTCCAATAAACGAGTGGATGAGAGAAGAGAACACAGCATCTGTTCCCCCAAGCAA  
AGGCATCATATCAAATTTTCGGATTCTTCTCAAAGCATCTATTTATAGACTTTGTGAGAATAAGTATCAT  
CTGGCCATAAAGAAGTTCCAGTTGTTCACTGAGGGATTCATGAGGCTCTTCTGTACAGCTTATGCAAAC  
TAGATATATAGGTCCTTTAACAAGAAAAACCACCTGGTGTTCCTCCGCCCTAACCAACTTCACACGAT  
CTCCCCCATTCTCCACGAAGGAAATGATGGCTTGCAAAGTTGCTGAAAATCCTGCTAGTCTGTGTTTCAT  
CTCCATATCTTGAATATATTGGTTTTCCGGAATGGCTTAAGATAAAAAAATGCTTCTTCCTTTTCTCCA  
TGAAGCAGAAGCATCATCTTCATTAACATGCCATTTCCAGGGACCCATTCCGAATCCACACTACAAC  
CAAAAGAACCACTCCTGTTATCCACCTCATCATCGCCACTAATCTCCTCGATACCTGAACCACTTATAC  
CACTACTACTAGTCCCTTTTCTCCAGCATATCCACTACTACTCGGACTCCCTTGCCCTTCCACCTC  
AACTTCCACATCCGAATTATTCCTCCACAACACTCCTTCGCCTCTCGAATTTCCAATACTTCTCTCTCT  
ACTTCTGTATACGAATCCGAACCTAATATATCCACTTCTCCAGAATTTTCAACTACTTCTCCGACTCGC  
GAATGTGAATCTGAAAGTAATGTACCGGTATTTTCTGGATTTTCAGCTACTGCTACTTGTTCGAGTTGC  
AAATGTGAATCAGAAGGTAATGTATCGATAGTTTGGGGATTCTCAGCTACTTCGAGTTGCGAATGTGA  
ATCGGAAGGTAATGTATCGATATTTTCGAGATTTTCAGCTACTACTTCGAGTTGCGAATGCGAATCGGA  
AGGTAATGTAGCGGCATTTTGGAGATGAGGGGGTATTAGGGGTTTTGAGTTGTGGTGATTGAGTGAAA  
TAGAGGTTAATTGACCTTCAATAGCGTCGAGAGATTGGTCAATAGAATCATGAATACAAGCTGAATTA  
GGAGTAGCAGATGATGACCCTGCAATGCTAGTAGATAAGCTCCCAAGTTCTGTTCCAGTCTCATTGTGT  
ACAATTTCTTTGAATCAGAAGATACAGAGTCTGAATTAGCTACTGCTGCGATTCCGATATCGATCGCC  
GTTGAATTCTCCATTTTGATCGAAATTTTAGCACTTATAAACAGAGTTGTGTATATATACACTTATACA  
GGAAGGAGAGAGAGAGGGGGGGGAGAGAGTATAAAACAATCAGAGAAGAGAGAGAGAGATTATAA  
AACAAAGAGATGGTGTATAAAATAAAGAGAGAGAGAAAG

**Gene abbreviation-** *PTBP*. **Gene ID-** TRINITY\_DN27766\_c3\_g2\_i10

**Gene sequence-**

GACAAAAATAGGTAAGTGGGTAAGAACCCCCCAGAATAACCAAAAAAAAAAAAAAGCTTTCCAGTCA  
ATGTCACTCAAACGTGTGACCTAGAAACATATTTATCACGCCACTAGAATTTTAAGTAGAACACAGTAC  
AATCTGCCATCCGCTACTTGATGTTTACAAGGATATGCACACATATCCTTGGTTGGACACCAAAGGAC  
AGTAAATAGAACAAAAACAATTTGAAGAATTCAAGTCTACTGAACAGAACTGATACAACCTTACTATC  
AGTAAGGTGGGTGGTGGTGATTATGTGGGGAAGAACTATCATGTTGCATATTTGACTGATTCCCAGGC  
TGACCTCCACTTGCTGAAGAACTGGGATTGATTGGCTGCTGTGTCCAAGAGGTGAGGAACCAGCAGG  
AGAGGCCATAAGATTATAAGCCTGACCAGAGGGAGGCCATAAGTTTGTCCAAGTAATGTGTTAGGG  
CCTGAAACAAAGGAGGGTCTGCTAAGCTGCATGGCTGGATTCCAAGATGGAGTTTGTCCAGGCGGGC  
CCTGCATGGGAGGTCCGTGGGCAGGAGGTCCTTGCCCGGAGGTCCGTGGTCAGGTGGACCTTGACCG  
GAAGGACCGTGGCCAGGAGGTCCCTTGACCGGGAGGGCCGTGGCCAGGAGGTCCTTGACCGGGAGGG  
CCGTGGCCAGGAGGTCCCTTGACCGGGAGGACCGTGGCCAGAAGGTCCTTGACCGGGAGGGCCTTGAG  
GCTGCCCATTAATTGATACTAGAAAATTCGCTCCCAATAAAGACCGGAGCAGCATGAGGATTCTGCCAT  
ACTGTTGCTCCAGCAGGCAGACCAGCAGCAAAACCGGACTCTGGTACTGTATAATCCCTACTTTTATC

GCTGAAGGCCTTTACATTGAGATCAGTATGACGAGAGTATGATATATGAAGCTTACAGTAGCCACCAT  
CATATATGCAGTGTCCCTCTAGAGCATCTTTAGCTACAGCGGCAGTGTTGACATCAGGATACTGAATTA  
GAGCCTGAGTTGTCGCGTTCTTCTCGAATATAGCAATTTTCTGAACCGTACCAAATGCAGAGAATACC  
GTGTTAAGAACATCTACAGTGACATCATAGATCCTATTTTCAATTGAGGCAAGAAGTACATTACTCTCC  
GGTTCTTTTTTCTTCCGTCAGGACCTACAACAGGCTGGACAAATCCCTCAATTGCAGTTGCATTAACA  
GGAAGATATGGATTTGTATAGTCCCGGCTACGGTGTGATTGGAACCTGATGTTTAGATCTGTGTGAGCT  
GAATATGAGATGCGCAGATTGCAAGAACCAACATGTTCTGGAAGCAAGTACCTTGAATACTTCTGCC  
ATCTAAAGCTTCCCTTGCTGAAAGAGCAGTCTCAGCATCAGTAACTGGATTAGTGCCTGGAAACCTG  
CTGCCTTCTCAAAAGTAGCAATCTTGTGCACAAATCCAAAAGCCGAGAAGACCAAGTGAATCACATC  
AATGCTTACATCACCGGCTTCTACACCCTCAATGGTTACCAGCAAGACATTTCCCGGAACATCACCTG  
GACCTTGTGTGTGACAATTTTCATGTCTGTTTGAATACTGTATATAAACATGTTTACCCCGAACAGATG  
CAGGTTCCGATGATGAAGCATAATATGAAACCATATTAATGGCCTGATTAAGATCCACAAATTCAACG  
AAGGCTTGATTGCGATTAGCGCCGACATTGCACTTGGTGTTAACGATCTTACCAAAGGCTTGCAAAG  
CTCAACGAGCTCTTCTTCGATACACTCCCAAGGCAAGTTACGCAAGTGAAGCACTTTAGATGGAGTCT  
GTGTGTATCGAAATTGAGGCTGATTTGAATTCGACATCCGCTCACTTTTGATTCAATTAGGGTTTTGTTT  
GTGTGTATATATATATGTAGTATTATTTGTATGGTGGTGCTGAATATGCAGAGGAGAGCTGAACGTTT  
T

**Gene abbreviation-** *GAPDH*. **Gene ID-** TRINITY\_DN26270\_c0\_g5\_i1

**Gene sequence-**

CAAAAATATCATCTCTTATCTTATAGAAATCTCTACATTTATCCTCACCACACACTCAGTTTGTAACCTC  
AAGATGCATATTCAGCATTAATACTTATATAGTTTCTCTTTTGCAAGGAACTTTTAAATAATATTTGTT  
CAATTTAATAAAGACAATATCTTAATAGAAAAAAATACAGAATAACACAAAATTAACCTTGAGATGG  
AACTAATGAGGAGTTCAATTAAGCTGCATGATAGAGTTGGAAGTAAAATGTAAGTGTATTATGTATAA  
ACACTGAAAAATAAGAAGAAAAAAGTAGGTATTCTCTGAGTCTTTAGTTGCAGCAATGGCTTGTA  
AGCAGCTCTGGTTTCTTCAAGCCTTCCAGTAAATATTAGACTTCCATCTAGAAGCTCTTATTCTTTCCCT  
GCTCATTGCTCCTCCAAGAGACTTGAAGTAGCTGAGTTTCCGGGCTCCGATCCAGTGTTTCGCTCACA  
TATTCAAAGAATGCTAGTGAAGGATCTTTCTTTGATGTGGTGGCTTCCCAACTTTCTCCTGAGACTTCA  
GGATTATCCCCTGTTAGAGGACAAACAGTTGCCAAATTGAAGGTAGCAATCAATGGTTTCGGACGCAT  
TGGCAGGAATTTTCTTCGTTGCTGGCATGGACGCAAGGACTCTCCACTCGAAGTTATTGTTGTCAATGA  
CAGTGGTGGTGTCAAGAATGCATCGCACTTGCTCAAGTACGACTCAATGCTGGGCACTTTCAAGGCAG  
ATGTTAAGATTGTAGACAGTGAGACCATCAGTGTTGATGGAAAGCACATCAAGGTTGTCTCCAACAGA  
GATCCACTCCAGCTTCCTTGGGCTGAGATGGGAATCGACATTGTTATTGAGGGTACTGGTGTGTTTGT  
GATGGCCCTGGGGCTGGGAAGCACATCCAAGCAGGGGCAAAGAAAGTTATTATCACCGCACCAGCA  
AAAGGAGCTGATATCCAACCTACGTTGTTGGCGTGAATGAGAAAGATTATGGTGATGACGTTGCTAA  
CATCATAAGCAATGCTTCTTGCACTACAACTGTTTAGCTCCTTTTGTGAAGATCTTAGATGAAGAATT  
CGGTATCATTAAGGGAACCATGACAACCACTCATTCTTATACAGGAGACCAGAGGCTTTTAGATGCTT  
CTCATCGGGACTTGAGGAGAGCCAGAGCTGCAGCTTTGAACATAGTCCCAACAAGTACTGGTGCAGC  
CAAGGCTGTATCTTTAGTGCTACCCCAACTGAAGGGTAAGCTGAATGGCATTGCACTCCGGGTGCCCA  
CGCCTAATGTATCCGTTGTTGACCTTGTTATAAATGTCGAGAAGAAAGGACTTACTGCTGAAGACGTC  
AATGCTGCCTTTAGAAAGGCTGCTCAAGGACCACTGAAGGGAATTCTGGAGGTCTGTGATTTGCCTCT  
AGTGTGCGGTGGATTTCCGGTGCTCTGATGTTTCATGCTCCATCGATTTCATCATTGACAATGGTCATGGG  
GGATGACATGGTCAAGGTCGTAGCCTGGTACGACAACGAATGGGGATACAGCCAAAGAGTTGTAGAT  
TTGGCAGATTTGGTAGCAAGCAAATGGCCAGGTGCAGCAGTAACTGGAAGTGGTGATCCATTAGAAG  
AGTTTTGCGAGACAAACCCTGCTGATGAGGAATGCAAAGTTTATGAATAATTTACCTTTGTTCCACCTT  
TATGCTTCCCAATTAAGTTGTTTAGGTGGTTGTTAAGTTCAAGTCATTGATGTGTTAGTGCGTCATGAT  
TTGTTTCGGAAGTGCAAGTATAATATGGAATCAGAGGATGGGGAGAGTCGGTCTAAACTACCAAGTG  
CAGGGGAAGGTATCGGAAATATGCTGGTTCTTGCAATTATTAGATTGGTGCATAATTGGGTAAATTTGAA  
ATGAACTGGTGACTGAAATAAGATCTGTGGGGAACATCAAGATATTGATGTTTTCAAAGATAGATGCC  
TGCTGTGTTTCAAAATTATTAAGCTTTGTTTTAATTATTACTCTTGACCGAATGGCCAACATAGAGGCTGC  
AACTGTTTTCTTGCTCTGCCTTTTACTGCTGTTTTTCTCTCCTTAATTAGTGGCAACATTTGATAATGCTT  
AGCAGCTGTAAGAGCTCCAACCTGCATAAAAGTAAACATACCATGACAATGTGCTCATACGGACTCGA  
CCAAGTCAAGAAAATAGACAGCAACCTCGCTCATGTAAGTATTCCCACCTAAACCAGCTAATAGAT  
AGACCTCCAACTTACTTGTAAGCAACTTTTGTAGCAGCACCAAACACTCCAACTTCTGAGCAGCTG  
AAGTGCTATACATTACAATGGCTCATTCTCTCATTTTTTC

**Gene abbreviation-** *ACT*. **Gene ID-** TRINITY\_DN29396\_c0\_g2\_i4

**Gene sequence-**

AATATAAACATGTGTTGCAGTAAAAGGAAAGAAAATGAAATTAAGTATTTAATAATTGGATAGGAA  
AATCAACATAACAACTCAACTCTAAGCATCCTACTAACAAGTCACAATTTTCTTTAACATACAGACT  
GATATACCAAACATAGTAGACAAAGAGTAGATGCATCAAAATCATTTTATCCTCTCTCCCAATTGTCA  
ACCCATCACAGGTAACCAAGTTCACATGAAAAATTACATTAAGCCAAATAAATTGAAAAAGAAA  
CTCCGAGTTCCAATGCATATAATACTGTAGAACTTAGAAGCACTTCCTGTGCACGATTGATGGGCCAG  
ACTCATCATATTCACCCTTGGAGATCCACATCTGTTGGAAGGTGCTCAGTGATGCAAGAATGGATCCT  
CCAATCCAGACACTGTATTTTCTCTCAGGTGGTGCAACAACCTTGATCTTCATGCTGCTGGGAGCAAGA  
GCAGTGATTTCCTTGCTCATACGATCTGCAATACCGGGGAACATTGTCGAACCACCACTGAGCACTAT  
GTTTCCATAGAGATCCTTCTGATATCAACATCACACTTCATGATGGAGTTGTAAGTAGTTTCGTGAAT  
TCCTGCAGCTTCCATTCCGATCAAAGATGGCTGGAACAGAACCTCAGGGCAACGGAATCTTTCAGCTC  
CAATTGTAATAACTTGACCATCAGGCAATTCATAATTCTTTTCCACAGAAGAGCTACTCTTCGAAGTTT  
CAAGTTCTGCTCATAGTCGAGGGCAACATAAGCAAGCTTCTCCTTCATGTCACGCACAATTTCCCGCT  
CGGCAGTGGTGGTGAACATGTAACCTCTCTCAGTTAAGATCTTCATGAGAGAATCAGTGAGATCACGC  
CCAGCAAGATCAAGACGAAGAATGGCATGGGGAAGGGCATAACCTTCATAAATTGGTACAGTATGGC  
TCACACCATCACCAGAGTCGAGCACAATACCAGTAGTACGTCCACTTGCATATAGAGAAAGGACGGC  
CTGGATCGCAACATACATAGCAGGAACATTAAATGTCTCAAACATGATTTGAGTCATCTTCTCCCTGTT  
GGCCTTAGGGTTGAGTGGTGCCTCAGTTAGAAGAACTGGGTGTTCTCTGGAGCAACTCGAAGCTCAT  
TGTAAGAAAGTGTGATGCCATATTTTCTCCATGTCATCCCAATTACTTACAATACCATGCTCAATTGGAT  
ATTTCAAGGTAAGAATACCTCTCTTCGACTGGGCTTCGTCACCAACATAAGCATCCTTCTGTCCCATCC  
CAACCATCACACCAGTATGTCTTGGTCTCCCAACAATACTGGGGAACACCGCTCTGGGAGCATCATCA  
CCAGCAAAACCAGCCTTCACCATTCCAGTTCCATTGTCACAACTAGGGGCTGGATATCCTCAGCATC  
GGCCATTTTATGTTACTGATAAAGAGTTGCTTTATCTCTCTCGATAATCTCTCTCTCGATAATCTCTCT  
CTGTTGTAACGATGAAGCGGATATGAGAGTAGTG

**Gene abbreviation-** *TIP41*. **Gene ID-** TRINITY\_DN25936\_c0\_g1\_i2

**Gene sequence-**

TAAAAAGATGTATAATGCAGAAGGTGTTTACATGCCTCTGGAAAATTTGTCTCAAATCTCAATTCAAGA  
GCAAGGAATATGGTAATGTATGCAGCTGGATGCCAAAGTAAAGATAAAAAACATTATGCAGTAAAAAG  
TAAAAACTGTGAAGATATAAATAAACTTTCCAGCATGTAATGATAAAATACAGCATTTCCATACT  
ATAAAGGATTAGTATAAGCGCACTGCGTACATGTTAATCAGGAATTATAAGCTTTTGGGTCTTATGCA  
AAATGATAGGAAGTCTTTGGCTGATGCTGCTTGGATCAATATACGCAGCACAATCAGAAGGATATCCT  
TTAGAAGCTAGTGCTTGAAATGTGGCTTCTCTCCAGCAACATTCTCTCAGAATAACTGGTTTTTTACCCT  
CACCAAAAATGCAATGGATGCGTGTGTCTTTAAACGCATAAGCACACCATCAACTCTAAGCCAAAA  
ACGCAAGAGAAGAAACCAACAGCTTGGCATCACTCTCACTTTTACTGTTAAAGCGCACTCCACTAT  
CAGCCAATTCATCTTCATAGAAGATCACCTCATCATAGAAGAGAATAGGCTCTTTTGATGCAAGTGCA  
GTCAAATTAATTCGTTCCCTCGCAGTCCTCCCAACGAAGCTTGCAACTGCCCTTCATCAGAGATTGTATCC  
CTCTCTGAGTTTTTCTCAACAGTTTCACTTCCACAATATGGTGTGTAAATGTGTAGTCATAATCTAATA  
TCACCTGCTGGAAAGGTTTGCATCTAAATTTCCAATTTGCTGCTGCAGGGACCTCAACTGGCGGTAATT  
TTTCTGCTTCCAACCAACTAGAGAATCAAATGCGTTGAAATGAATCTTACATCGCTCTTCAAGTGCT  
TGAGAACCAATGAACTTTCCCCAAAAACCATTTCTGGCAAGTGAGAGGTCTGAAGCTTTTGTTCAC  
AATTGGACGTTGACTGAGTTGAGGATGGGGAACCTGCGAGTTTCAATCTCCAATCGTTAATTATTA  
CCAGTTCTTCCGTCAGGAAGGAGCTGAGCTCCGGCAGCTTTAAGCTCTTCTTGTGATCTCAACTTCC  
ATATTCCGACTTGTTTACCTGATCAGCCGGTCACCAGTTGCCTATATATATCTTCAAGTGACAGCGAGC  
TCTAATGATTCTTTTTCCGATTTTCA

**Gene abbreviation-** *CYP2*. **Gene ID-** TRINITY\_DN25407\_c0\_g2\_i1

**Gene sequence-**

TTAGTTAAAAAAACACACACAAAACACATACAACCTCTCTCCGATCTCTCCACCGTCGTTGATCTCTC  
TCCGGCAGGCTTGAAGGTGGGAGCTAGACGGGAACCTCAGGCTCGTGCCTTGATGCCAGGTGTAGCT  
TGACAAGTGCACGTTTGTATGCTGTGTTCAGTTATAGAAAATATGGGTTCTTTCTGCAGTAAACAGCGA  
CATAATCAAGCTGATTCCGAAGAAAATGCACAGACTGCAGAAATAGAAAGGCGAATTGAGCTAGAA  
ACAAAGGCAGAGAAACATATACATAAGCTTCTTTTACTTGGTGTGAGAGTCAGGAAAATCAACAA  
TCTTTAAGCAGATAAACTTCTATTTAGACCCGGCTTTAATGAGGCTGAGCTAAAGAGCTACATTACA  
GTTATTCATGCAAATGTGTATCAGATAATAAAAAATATTATATGATGGGGCAAAGGAATTGGCTCAAAA  
TGAAGAAGAATCCTCAAAATATGCTTTATCGGTTGAAATCAAGGAAATAGGAGAGAAACTATCGGAA  
ATTGGTGGCAGGTTGGATTATCCTCGCCTCAGTAAAGAGCTTGCTCAAGAAATAGAACTCTCTGGAA

AGACGACGCGATACAGGAAACATATTCTCGGGGTAATGAACTCCAAGTTCCTGACTGCACTCTTTATT  
TCATGGAAAATTTACAAAGGTTGGCTGTTGCGGATTATATTCCGACAAAGGAGGATGTTCTTTATGCA  
AGGATCCGTACAACCTGGTGTGTAGAAATTCAGTTCAGCCCGTTGGAGAGAAACAAAAAAGTGGCG  
AAGTATATAGATTATTTGATGTTGGAGGTCAGAGAAATGAGAGAAGGAAATGGATTTCATCTGTTTGAA  
GGTGTACAGCTGTGATTTTTTGTGCTGCCGTTAGTGAGTATGATCAGACTCTTTTTGAGGACGAGAAC  
AGGAACAGAATGATGGAGACAAGAGAACTCTTTGAGTGGGTCCTCAAGCAGCCATGTTTCGAGAAAA  
CATCCTTCATGCTGTTTCTGAACAAATTTGATATATTTGAGAAGAAGGTTCTAGATGTGCCACTAAATG  
TATGCGATTGGTTTAAAGATTACCAACCAGTATACTCGGGAAAGCAGGAAGTCGAGCATGCATATGA  
GTTTGTCAAAAAGAAATTTGAGGAGCTATATTTCAAAGCACTGCCCTCACTGCGTGGACCGAGTTTT  
TAAGATATATAGGACAACCTGCTCTTGACCAGAAGCTTGTGAAAAAGACTTTCAAGCTGGTAGACGAG  
ACCTTAAGAAGGCGAAACCTCTTCGAAGCGGTTTGTGTGATAGTGGATTTTCATCCGAAAGGAAATG  
TTAATATCTTGAAAAGCTAGATTCTGCAGTGAGGTGGGAACACTCATTAAACTCTTTACACCGTAATT  
TACAGGTAAAAAATGGCTGTTTGGTATACCCTCTGTAATAGGAACTTGATGTTACCCCTGTTTCTTTTT  
GCCTTAAAAGAAGTCCCCAAGATTTTGTCTGTTTGTAGCATACCGCTAGTTGGAGAAGCAAGCAA  
GTATATCAAAAGTTTTTTTATACCTTAATTTGTTTTTGTTTTTTACAGTGATCTGTTTTATGTTTTACCT  
AAGAATTG

**Gene abbreviation-** *EF1α*. **Gene ID-** TRINITY\_DN32140\_c1\_g3\_i6

**Gene sequence-**

CAAGAATTGAGGTCAATAACAAAAAAATACTAATATCGTCCATTTCATTTAAAGATTTTTTCTCTAT  
ATAAAGTTTCTATCAAGTTTTACAACACCAGTCTCTTCTTTCATCAAGGCCTTTTTTGTCAACATATATA  
GAGTTCATCTCTTTGACAAGTTAGTAGCTGATCACAATGGGCAAGGAGAAGGTTACATCAGCATTGT  
GGTGATTGGCCATGTGGATTCCGGAAGTCAACCACCCTGGTCATCTCATCTACAAGCTTGGCGGGA  
TTGACAAGCGCGTGATTGAGAGGTTGAGAGAAAGAAGCAGCTGAGATGAACAAGCGTTCGTTCAAGTA  
TGCGTGGGTGCTTGACAAGCTCAAGGCTGAGCGTGAGCGTGGTATCACTATTGATATTGCTCTGTGGA  
AGTTTGAGACTAACAAGTACTACTGCACTGTCATTGATGCCCTGGACATCGTGATTTTCATCAAGAAT  
ATGATTACTGGAACCTCTCAGGCTGACTGTGCTGTTCTTATCATTGATTCAACTACTGGAGGTTTCGAA  
GCTGGTATCTCCAAGGATGGGCAGACGCGTGAGCATGCCTTGCTTGCTTTCACACTTGGTGTCAAGCA  
GATGATTTGTTGCTGCAATAAGATGGATGCCACAACCTCCAAGTACTCCAAGGGTAGGTATGAAGAA  
ATTGTGAAGGAGTTTTCTTCGATTTGAAGAAGTTGGGTACAACCCCGACAAAATTGCATTTCATTCCC  
ATCTCTGGATTTGAGGGTGACAACATGATTGATAGGTCTACCAACCTTGACTGGTACAAGGGACCGAC  
TCTTCTGAAGCTCTTGACCAGATCTCTGAGCCCAAGAGACCATCAGACAAGCCCCCTTCGTCTCCCACT  
TCAGGATGTTTACAAGATTGGAGGTATTGGAACCTGTTCCAGTGGGACGTGTTGAAACTGGTGTGATCA  
AGCCTGGTATGGTTGTGACTTTTGGTCCCTCAGGGTTGACCACTGAAGTCAAGTCTGTTGAGATGCATC  
ATGAGGCTCTCCAGGAGGCTCTTCTGGTGACAATGTTGGATTCAATGTTAAGAATGTTGCTGTTAAGG  
ATCTCAAGCGTGATATGTTGCCTCCAACCTCCAAGGATGATCCCGCCAAAGAGGCTGCCAACTTCACT  
GCTCAAGTTATCATCATGAACCACCCTGGTCAGATCTCAAATGGTTATGCTCCAGTTCCTTGATTGCCAC  
ACCTGTCACATTGCTGTTAAGTTTGTGAAATCCAAACCAAGATTGATCGTCGATCGGGTAAGGAGCT  
TGAGAAGGAGCCCAAGTTTTTGAAGAATGGTGATGCTGGATTGTTAAGATGATTCCAACCAAGCCAA  
TGGTGGTTGAGACCTTTATGACCTACCCTCCTTGGAAAGTTTGTGTTAGGGACATGAGGCAGACTG  
TTGCTGTGGGAGTCATCAAGAGTGTGGAGAAGAAGGAACCTACCGAGCCAAGGTCACAAAGGCGG  
CAATCAAGAAGAAATGAACCGGTGCTGTTGGTGGGTATCGGTGTGGTAATACTGCAGGCTGGATTGCT  
CTTGTTGGTTTTAATATTAAGTCAAGTTTCTGTTATGTTTCGTGTCATGTGTTTTGCTGTGTCAGCCACCTG  
GTCGCAGAATTGGGTGCTTGACAGGCGGTGGTGTGGCTATTATTAGCCTGTTATCCTTGTTGCTTTTT  
CTTCTTGTTTTCTTCTGTTTTTAAAAGACTACCGTGTTATTTGATGTTATATGACAGACCAGCCGTTGA  
TTTTGGTGTATGTTGCCCTTGAGTGTGTGATTCTTTTTTGCCAAGTTTATATGTTTAGTTTCATCTACG  
AAAGACTGCCGTTTTGTTTAGATATCTTGACAATGTTATTTACCAGGTAAGATTGAAGTGGAAATTGT  
TTCTTCAAGTGTAACAGTAACGTGGTTAGTCATCCATGTATGTATGTTTGAACCTCCATCTCATTTCGG  
AAAATTGCTTTTTTC

**Gene abbreviation-** *UBC9*. **Gene ID-** TRINITY\_DN32451\_c0\_g1\_i7

**Gene sequence-**

CACGCTACTATCATCATTTTTCTCTACATCTTCCACTTCATTTACAGCTTCCATCTTTCACATTTCTTGGTAA  
GTAGTTGACGATGGCTTCTAAGAGGATTTTGAAGGAACTTAAGGATCTTCAGAAGGATCCTCCTACTTC  
TTGTAGCGCTGGCCCTGTTGCTGAAGATATGTTTCACTGGCAAGCTACAATTATGGGCCCTCCAGATAG  
TCCTTATTTCTGGTGGGGTTTTCTCGTTACCATAACATTTCCCTCCAGATTATCCGTTCAAGCCACCAAAG  
GTGGCATTTAGAACAAAGGTTTTCCACCCGAATATAAACAGCAACGGGAGCATATGCCTAGACATTCT  
GAAAGAACAATGGAGCCCTGCTCTGACCATTTCGAAGGTTTTGCTGTCAATATGCTCCTTGCTGACAG  
ACCCAAATCCGGATGACCCTTGGTGCCCGAGATAGCTCACATGTACAAGACAGACAGAAACAAGTA

TGAAACAACCTGCAAGGAGCTGGACCCAGAAGTATGCCATGGGTAAAGAAGCTATGCGTTTATGATGG  
AATTGCCTTTCTCTTAAAAATAATT

**Gene abbreviation-** *TUB6*. **Gene ID-** TRINITY\_DN9948\_c0\_g1\_i1

**Gene sequence-**

CTCTCTCTCTCTCTCTCTCTCTCTCTCTCTCTCATGTGTAGATCTACGAATGTTGGCAATGTA  
AATGAACTCGTTGAAATGTGTCCATATTTTGTATATATATTCTGATTTTGTATGGTATTTGTTTATT  
ATTGTTGAAGATGAGATGACTACAGATCTTCGAGTATTGGTTATTTATATGAAGTTGTTGAAATGTTTG  
TGTGTGTGTGCATGCATAGATCTGCGAGTATTGATGTGTAAATGAACTTGTGAGATGCGTGTATATAT  
GTGTGTGTATGAGATAAGGAAGAGTAGTGTGTTTACTAATTGTTTTTTGATTATTATTCACATTACGTA  
TTGCTCGAGCTGTATCCCTTTATGCCTATGTTTGTATTAAGTATACAAGTGTATTATGTTTTGTGCTG  
ATCTGATTCATATCTTCGTGATTTGTATGTTTTATTCAGTCTCTAGGTCATACTGTAAGACAGTAATG  
TATATACAGATCTGTATAGATTTAAACAAGCATGTGATTCTCGAATGTTCTGTATGGGTGTCAATTAAC  
TGAGCACATTCTGTTTGTAGGTTTATATGCAGGTGTTTGTCTCATGTGTTTCTCATGATTTGGTTTT  
AGAGATTTATATGATGTTGTGAGGTCTTTATTATTTTAATTTGAGAACTAATGCTAGACTTGATATGA  
CATGTGTGTATGTATAAGATTTAGATATTGTGCTGATTATTA

**Gene abbreviation-** *YLS8*. **Gene ID-** TRINITY\_DN29984\_c0\_g1\_i5

**Gene sequence-**

GGTGAGAGAGATGAGCGAGAGAGATGAGACAGAGAGGAGAGAGTTCGTTGTGTGAAAGGGGGGTGAT  
TGATAGTTGATACAATCGTCTATACCTAGATATCGAGAGAGAGATCGAGAGAGATCGAGATCGAGCG  
AGAGAGAGAGAGGAGAAGATGTCGTATTTGCTTCCACACTTGCCTCAGGATGGGCAGTAGACCAGG  
CGATTCTCGCTGAGGAAGAACGCCTCGTCGTATTTCGCTTCGGTCACGATTGGGATGAACTTGTATGC  
AGATGGATGAAGTACTAGCTTCTGTTGCGGAGACGATAAAGAAGCTTGTCTGTCATTTATCTCGTGGATA  
TTACTGAGGTGCCCGATTTCAACACTATGTACGAACTGTACGATCCTTCTACTGTTATGTTCTTTTTCAG  
GAACAAGCATATTATGATTGATCTTGGCACTGGGAACAACAATAAGATTAATTGGGCAATGAAGGAC  
AAGCAGGAGTTTATTGACATTATTGAAACGGTTTATCGTGGAGCAAGGAAAGGCCGTGGATTGGTCAT  
TGCACCCAAAGATTACTCCACCAAGTACCGCTATTAGTCTGTCTGCATCATTTGGCAGGTTGACGAG  
GCTAAACAATACTTTAACTGTTGAAAAGTATTATGTGACATCAAATTGTTCAAGTGAGTTGGGCCTTAA  
GGACTGTGTGCACCTTGAATGTGTGAAGGAACAAGGACATGGCAGAAATACCACTGAAGTTGCAGCG  
TCAATTTGCTACGTTCTTCAACAGGGTAGTCTCTAGCTCTACTCTTAATTTACTGTGTGCACCTTGAAT  
GTGTGAAGGAACAAGGACATGGCAGAAATACCACTGAAGTTGCAGCGTCAATTTGCTACGTTCTTCA  
ACAGGGTAGTCTCTAGCTCTACTCTTAATTTACT

**Gene abbreviation-** *TUBA*. **Gene ID-** TRINITY\_DN27287\_c1\_g6\_i1

**Gene sequence-**

CTTTGGTGATCTCAACCACTTGATTTCGGCCACAATGTCTGGTGTTACATGTTGCTTGCCTTCCCTGGT  
CAGTTGAACTCTGACCTCAGGAAGTTGGCTGTAAATCTAATCCCCTTCCCTAGGCTTCACCTCTTTATG  
GTGGGTTTTGCACCTCTTACATCCCGTGGTTCCCAACAGTATCGTGCTTTGAGTGTGCCTGAGCTTACCC  
AACAGATGTGGGATTCCAAGAACATGATGTGTGCGGCTGATCCCCGCCATGGTAGATACTTGACAGCT  
TCTGCTGTGTTGAGAGAAAGATGAGCACCAAGGAGGTTGATGAGCAGATGATCAATGTTGAGAACAA  
AGAACTCATCTTACTTTGTTGAATGGATCCCAACAATGTGAAGTCAACTGTTTGTGATATCCACCGA  
CTGGCTTGAATAATGGCTTCTACTTTTATTGGGAATTCGACTTCAATTCAGGAGATGTTGAGGCGTGTGA  
GTGAGCAGTTTACTGCTATGTTGAGGAGAAAGGCCTTTTTGCATTGGTACACAGGCGAAGGTATGGAC  
GAGATGGAATTCACCGAGGCTGAAAGCAATATGAACGATCTTGTCTGAGTATCAGCAGTACCAGG  
ATGCAACTGCTGATGAGGAGGGAGAATATTTTGAAGATGAAGAAGAGGAGGGGCAAGAAATGTAAG  
GTGTGTTCTGCCATGAGTGTACTGTGTGAACTGCTGAGTATGTAGGATGCTGCAACTGTGTGTTGCCTTT  
TGGGCAGTCTTCTGAAGCTGTTGTCTAGCTATTATGTGGTTTGTAAATTTCTCAAAGACAGTTTGCGA  
AATCTTGTTAAGAATTTAACTTGGCTTTGTTATTATATTCAGTTTATTTGCAGATTTAGTAGTTTTGGT  
TGCTTGGGTTACAAAAGCAAAGTTTACTTAATGATT

**Gene abbreviation-** *PAL*. **Gene ID-** TRINITY\_DN30247\_c1\_g2\_i1

**Gene sequence-**

ATGGATTGCCAGACCAAGAATGTTGTGTGAGTAAACGGGACAGGTGATTCGCTATGCATGCAGAAAG  
ATCCTTTGAACTGGGGAATGGCTGCGGAGTCATTGAAAGGAAGTCATTTGGACGAAGTTAAGAGGAT  
GGTGGCTGAGTTTAGGAAGCCTATGGTGCAGCTGGGTGGAGAGACATTGACGGTTTCTCAAGTGGCCG  
CTATTGCTTCCGGTTACGTCAAGGTTGAGTTATCGGAGACGGCAAGGGCTGGAGTTAAAGCTAGTAGT

GATTGGGTGATGGAGAGTATGAATAAAGGAACCGATAGTTATGGTGTTACTACCGGTTTTGGTGCTAC  
TTCTCATAGGAGGACTAAACAAGGTGGTGCTTTGCAGAAAGAACTTATTAGGTTTTGAATGCTGGAA  
TCTTTGGAAATGGAAGTGATTCTTCCAACACATTACCACATTCAGCAACAAGAGCAGCAATGCTTGTG  
AGGATCAACACACTTCTCCAAGGTTACTCTGGCATTTCGATTTGAGATCCTTGAAGCAATTACAAAAGTTT  
CTCAACCAAAAACATTACTCCTTGTTTGCCACTCCGCGGAACAATCACTGCTTCTGGTGATCTCGTTCCC  
TTATCCTACATTGCTGGACTTCTAACAGGACGTCCCAATTCTAAGGCGGTCGGACCCACTGGAGAAAA  
TCTAACCGCTGCAGAAGCATTTAAACTTGCTGGAGTTGATGGTGGATTCTTTGAGCTGCAGCCAAAAG  
AAGGCCTTGCTTTAGTCAATGGAACGGCTGTTGGTTCTGGGATGGCTTCGATGGTTCTCTTTGAGACCA  
ATATACTTGCTGTGTTAGCTGAGGTTATGTCAGCTATATTTGCTGAAAGTGATGCAGGGCAAACCAGAAT  
TCACTGACCACTTGACACATAAGTTGAAGCATCATCCAGGACAAATTGAAGCCGCGGCCATCATGGA  
ACACATATTGGACGGTAGCTCTTACGTTAAGGCTGCTCAGAAGCAACATGAAATGGATCCCCTGCAAA  
AACCAAAACAAGATAGATATGCTCTTAGGACGTCTCCACAATGGCTTGGACCGCAGATTGAAGTAATT  
CGATCATCAACAAAAATGATAGAAAGGGAGATCAATTCTGTCAATGATAACCCTTTGATTGATGTGTC  
AAGGAACAAGGCCATACATGGTGGTAACTTCCAGGGTACCCCTATTGGAGTTTCTATGGACAATACAA  
GGTTGGCTATTGCAGCCATTGGAAAGCTCATGTTTGCCCAATTTTCGGAGCTTGTGAATGATTTTTATA  
ACAATGGGCTGCCATCTAATCTATCCGGAGGACGTAATCCAAGTTTGGATTATGGTTTCAAGGGTGCT  
GAAATTGCTATGGCTTCTTACTGCTCTGAGCTGCAATTTTTGGGCAATCCAGTCACCAACCATGTCCAA  
AGTGCTGAGCAACATAATCAGGACGTGAACTCCCTGGGTTTAATCTCCTCGAGGAAAACAGCAGAAG  
CTGTTGAAATCTTGAAGCTCATGTCTACCACATTTTTGGTAGGCCTCTGCCAAGCTGTAGACCTGAGGC  
ATCTGGAGGAGAACTTGAAGAGCACTGTGAAGAACACTGTAAGCCAAGTAGCCAAGAAAGTCCTAA  
CTATGGGTGTCAACGGTGAGCTTCATCCTTCAAGATTTTGCGAGAAGGATTTGCTTAGAGTTGTTGACC  
GAGAGTACATTTTGCATACATTGACGACCCCTGCAGTGCAACCTACCCATTGATGCAAAAATAAGA  
CAAGTACTAGTTGAACACGCACTGAAGAATGGCGAAACTGAGAAGAACTTGAGCACTTCAATCTTCC  
AAAAGATTGCAGCTTTTGAAGATGAATTGAAGACCCTTTTGCCAAAGGAGGTTGAAAGTGCTAGGGCT  
GTGCTTGAGAGTGGAATCCTGCCATTCTAACAGAATTAAGGAGTGCAGGTCTTATCCATTGTACAA  
GTTTGTAAGGGAAGAGTTGGGAACAGTTTATTTAACCGGTGAGAAAGTGACATCGCCTGGAGAGGAG  
TTTGACAAGGTGTTACGGCAATGTGCAAAGGACAGATCATTGATCCTCTGATGGAGTGTCTACAGAG  
CTGGAATGGAGCTCCTCTACCAATTTCTTAG

**Table S2.** Ct values of 11 candidate genes of *A. dahurica*.

| Treatments                 | Replicates | <i>SAND</i> | <i>PTBP</i> | <i>GAPDH</i> | <i>ACT</i> | <i>TIP41</i> | <i>CYP2</i> | <i>EF1<math>\alpha</math></i> | <i>UBC9</i> | <i>TUB6</i> | <i>YLS8</i> | <i>TUBA</i> |
|----------------------------|------------|-------------|-------------|--------------|------------|--------------|-------------|-------------------------------|-------------|-------------|-------------|-------------|
| control<br>(Sterile water) | 1          | 26.7796     | 24.9754     | 20.5092      | 21.7106    | 25.2387      | 23.4786     | 18.5456                       | 21.8313     | 26.9064     | 21.8604     | 18.9995     |
|                            |            | 26.0154     | 26.2328     | 21.3897      | 21.7227    | 24.7191      | 23.247      | 18.3417                       | 21.6811     | 27.0457     | 21.6851     | 19.9748     |
|                            |            | 25.6375     | 25.3116     | 20.5816      | 21.5386    | 24.4656      | 23.5801     | 18.37                         | 21.6032     | 26.7851     | 21.5499     | 19.4524     |
|                            | 2          | 24.7305     | 25.2539     | 20.5479      | 21.3273    | 25.2951      | 23.7765     | 18.58                         | 22.0090     | 26.4068     | 21.7510     | 18.7972     |
|                            |            | 24.6274     | 25.3785     | 20.4767      | 21.4485    | 24.4048      | 23.9245     | 18.461                        | 21.8286     | 27.0241     | 22.2643     | 18.8000     |
|                            |            | 24.5452     | 25.1263     | 20.6160      | 21.6452    | 24.3100      | 23.7071     | 18.5504                       | 21.7288     | 26.5058     | 22.0746     | 18.6702     |
|                            | 3          | 25.2893     | 25.3798     | 20.3741      | 21.5655    | 24.8711      | 23.5564     | 18.5320                       | 21.6482     | 26.7834     | 21.7418     | 19.2246     |
|                            |            | 25.4773     | 25.2239     | 20.3689      | 21.4896    | 24.7389      | 23.6190     | 18.4750                       | 21.7803     | 26.7790     | 21.8642     | 19.1157     |
|                            |            | 25.4013     | 25.3357     | 21.3177      | 21.6414    | 24.6067      | 23.6816     | 18.4180                       | 21.9154     | 26.7746     | 21.9866     | 19.0068     |
| SA                         | 1          | 21.7174     | 22.0633     | 18.6099      | 19.1928    | 22.7132      | 22.5562     | 16.5078                       | 19.5212     | 25.6771     | 18.2956     | 17.8476     |
|                            |            | 21.9887     | 22.2833     | 18.4669      | 18.6875    | 22.976       | 22.2217     | 16.2551                       | 19.4069     | 25.3198     | 18.0057     | 18.3292     |
|                            |            | 22.0935     | 22.3328     | 18.6546      | 19.5741    | 22.4223      | 22.9421     | 16.8064                       | 19.0596     | 25.661      | 18.5891     | 17.6858     |
|                            | 2          | 22.0703     | 22.1887     | 18.5610      | 19.0431    | 22.3472      | 22.6054     | 16.4208                       | 19.3074     | 26.1895     | 18.2997     | 18.5005     |
|                            |            | 21.9299     | 22.5842     | 18.8041      | 19.0439    | 22.0014      | 22.217      | 16.1815                       | 19.2369     | 25.5632     | 18.1296     | 17.8355     |
|                            |            | 21.6310     | 22.6219     | 18.4918      | 18.8719    | 22.0394      | 22.0648     | 16.1237                       | 19.1375     | 25.7548     | 18.1235     | 18.3066     |
|                            | 3          | 21.7614     | 22.2724     | 19.1491      | 18.7479    | 22.9699      | 22.6789     | 16.1549                       | 19.163      | 26.0422     | 18.0615     | 18.1982     |
|                            |            | 21.9723     | 22.6694     | 18.4285      | 19.0275    | 22.0327      | 22.1581     | 16.3631                       | 19.3403     | 25.4211     | 18.1858     | 17.7485     |
|                            |            | 22.3478     | 22.4948     | 18.3379      | 19.3941    | 22.4056      | 22.1642     | 16.105                        | 19.1987     | 25.8507     | 18.0646     | 18.5728     |
| NaCl                       | 1          | 28.1626     | 27.6881     | 24.4006      | 23.8432    | 28.2176      | 27.2359     | 21.7818                       | 23.3076     | 31.4448     | 22.6736     | 22.2059     |
|                            |            | 26.7949     | 26.3821     | 23.0588      | 24.0683    | 28.4427      | 26.1603     | 21.4205                       | 23.2034     | 32.0233     | 22.1394     | 21.4259     |
|                            |            | 28.3305     | 26.7041     | 23.0741      | 24.5837    | 27.2681      | 26.4281     | 21.9248                       | 23.1291     | 30.1621     | 22.1998     | 20.7281     |

|                   |   |         |         |         |         |         |         |         |         |         |         |         |
|-------------------|---|---------|---------|---------|---------|---------|---------|---------|---------|---------|---------|---------|
|                   | 2 | 26.9465 | 26.6733 | 23.2006 | 23.5006 | 27.1249 | 26.6582 | 21.6848 | 23.0029 | 30.1340 | 22.4139 | 20.8482 |
|                   |   | 26.1030 | 26.8729 | 23.0847 | 23.7186 | 27.0179 | 25.9805 | 21.6646 | 23.2386 | 29.7338 | 22.3048 | 21.0040 |
|                   |   | 26.7713 | 27.5248 | 24.3431 | 24.8678 | 28.0863 | 27.4021 | 22.1602 | 23.5704 | 30.2343 | 23.3645 | 21.7983 |
|                   | 3 | 26.6052 | 27.0890 | 23.2472 | 24.5346 | 27.1836 | 26.0972 | 22.1598 | 23.0597 | 31.9393 | 22.4572 | 20.9445 |
|                   |   | 28.0183 | 26.7022 | 23.2406 | 23.6792 | 27.1727 | 26.6678 | 22.0168 | 23.0690 | 30.7128 | 22.4195 | 20.4672 |
|                   |   | 26.5768 | 26.8850 | 23.3479 | 24.0502 | 27.1328 | 26.0810 | 21.9005 | 22.9463 | 30.8291 | 22.3408 | 20.5944 |
| MeJA              | 1 | 24.3847 | 22.8734 | 18.3225 | 18.8426 | 22.2894 | 22.3278 | 16.8268 | 19.3080 | 25.2183 | 18.6305 | 18.0991 |
|                   |   | 22.9342 | 22.2495 | 18.2781 | 19.2405 | 23.0147 | 22.0847 | 16.9592 | 19.2496 | 24.0228 | 18.2840 | 18.0059 |
|                   |   | 22.5406 | 22.4879 | 18.9565 | 19.7952 | 22.8795 | 22.2989 | 17.0654 | 19.1088 | 25.5384 | 18.4930 | 18.5912 |
|                   | 2 | 22.4508 | 22.4930 | 18.5868 | 20.0964 | 22.2652 | 22.364  | 16.8964 | 19.2758 | 26.0537 | 18.4089 | 18.0945 |
|                   |   | 22.6849 | 22.3192 | 18.4791 | 19.0890 | 22.3308 | 22.2729 | 16.6704 | 19.1972 | 25.9867 | 18.2951 | 17.7949 |
|                   |   | 22.5326 | 22.3650 | 18.6733 | 19.1450 | 22.4726 | 22.1747 | 17.0311 | 19.3972 | 26.0454 | 18.8597 | 17.7558 |
|                   | 3 | 22.4611 | 22.3332 | 18.6051 | 19.4749 | 22.6395 | 22.489  | 17.0059 | 19.2645 | 25.4616 | 18.5307 | 17.9584 |
|                   |   | 22.8289 | 22.4818 | 18.8528 | 20.1567 | 22.4409 | 22.357  | 16.9658 | 19.3586 | 25.6906 | 18.4776 | 18.1372 |
|                   |   | 23.0577 | 22.5166 | 18.7774 | 19.5848 | 22.3452 | 22.4686 | 17.0911 | 19.4295 | 25.6976 | 18.7601 | 17.6551 |
| CuSO <sub>4</sub> | 1 | 24.0607 | 22.6570 | 18.8603 | 19.9596 | 22.7376 | 22.9057 | 17.5603 | 19.1686 | 27.276  | 18.1021 | 19.0073 |
|                   |   | 22.7708 | 22.4717 | 19.0393 | 20.1678 | 22.6403 | 23.4852 | 17.7866 | 19.1898 | 27.6375 | 17.9916 | 18.8502 |
|                   |   | 22.8999 | 22.7428 | 18.9328 | 20.1775 | 23.0452 | 23.0228 | 17.4818 | 19.2384 | 27.4543 | 18.069  | 19.0701 |
|                   | 2 | 22.7396 | 22.8036 | 18.9603 | 20.4849 | 22.6968 | 22.7883 | 17.7583 | 19.155  | 26.9114 | 18.0533 | 18.9489 |
|                   |   | 23.0127 | 22.6337 | 19.0128 | 20.3243 | 23.0193 | 22.9378 | 17.9536 | 19.2114 | 26.9023 | 18.1965 | 19.1975 |
|                   |   | 22.6950 | 22.4650 | 19.0761 | 19.9690 | 23.1276 | 23.0891 | 17.8238 | 19.2117 | 27.1723 | 18.4890 | 19.1018 |
|                   | 3 | 22.9718 | 22.9853 | 19.0278 | 18.9623 | 22.6176 | 23.2046 | 17.8569 | 19.1174 | 26.2809 | 18.0823 | 19.0054 |
|                   |   | 22.8171 | 22.4113 | 19.0395 | 20.2295 | 22.5242 | 22.8805 | 17.5526 | 19.1426 | 26.3443 | 18.4341 | 18.792  |
|                   |   | 23.0119 | 22.8497 | 19.3903 | 22.1814 | 22.6575 | 23.1692 | 17.6109 | 19.1524 | 26.9404 | 18.4422 | 18.5365 |

|          |   |         |         |         |         |         |         |         |         |         |         |         |
|----------|---|---------|---------|---------|---------|---------|---------|---------|---------|---------|---------|---------|
| ETH      | 1 | 24.0966 | 20.6716 | 19.4353 | 18.9626 | 22.1293 | 20.0265 | 15.3937 | 19.1778 | 22.5001 | 18.1724 | 17.5492 |
|          |   | 22.2369 | 20.4885 | 19.3298 | 18.9295 | 22.202  | 20.1662 | 15.6543 | 19.1699 | 21.9569 | 18.0848 | 17.417  |
|          |   | 22.2467 | 20.7675 | 19.4226 | 18.9295 | 22.3121 | 19.9637 | 15.6087 | 19.4549 | 22.2923 | 18.1503 | 17.567  |
|          | 2 | 22.2198 | 20.4324 | 19.5191 | 18.5836 | 22.0438 | 20.0572 | 15.6818 | 19.1448 | 21.8028 | 18.153  | 17.6431 |
|          |   | 22.1774 | 20.4908 | 19.3958 | 19.0139 | 22.198  | 20.0246 | 15.7348 | 19.2686 | 22.0942 | 18.1609 | 17.5624 |
|          |   | 22.0925 | 20.6835 | 19.7655 | 18.96   | 22.1717 | 20.0511 | 15.5777 | 19.2127 | 22.0105 | 18.3093 | 17.7466 |
|          | 3 | 22.1983 | 20.6159 | 19.5304 | 18.928  | 22.2718 | 19.9943 | 15.5919 | 19.1625 | 22.2176 | 18.1849 | 17.8276 |
|          |   | 22.2761 | 20.6559 | 19.6523 | 19.038  | 22.4386 | 20.087  | 15.7288 | 19.2283 | 22.3136 | 18.3114 | 17.7013 |
|          |   | 22.4342 | 20.7286 | 19.4575 | 19.0204 | 22.1388 | 19.8966 | 15.6619 | 19.1548 | 22.0905 | 18.2378 | 17.6076 |
| ABA      | 1 | 24.0077 | 22.5018 | 18.6524 | 19.1425 | 22.4655 | 22.1150 | 17.0420 | 19.7961 | 25.9089 | 18.3758 | 18.1349 |
|          |   | 22.5823 | 22.3677 | 18.3390 | 18.1592 | 22.3470 | 22.2609 | 16.9196 | 19.2394 | 25.3115 | 18.3895 | 18.4216 |
|          |   | 22.503  | 22.4611 | 18.6017 | 17.8520 | 22.1654 | 22.1051 | 16.9700 | 19.6825 | 25.3457 | 18.4803 | 17.6571 |
|          | 2 | 22.5648 | 22.4203 | 19.2503 | 19.1916 | 22.2034 | 22.3039 | 16.7970 | 19.5989 | 26.5266 | 18.5078 | 17.6909 |
|          |   | 22.2935 | 22.3245 | 18.9597 | 19.0963 | 22.5591 | 22.5924 | 16.9992 | 19.2933 | 25.8303 | 18.2199 | 17.7087 |
|          |   | 22.5785 | 22.3098 | 18.5620 | 18.8621 | 22.2503 | 21.4463 | 17.0097 | 19.2701 | 25.5646 | 18.3540 | 17.6348 |
|          | 3 | 22.3953 | 22.2074 | 18.5930 | 19.144  | 22.8901 | 22.4471 | 16.9291 | 19.3318 | 25.8438 | 18.4100 | 18.0863 |
|          |   | 22.5240 | 22.4512 | 18.6340 | 19.2493 | 22.4294 | 22.3467 | 17.0162 | 19.3795 | 25.4276 | 18.4294 | 17.9449 |
|          |   | 22.5337 | 22.3306 | 18.9883 | 19.8925 | 22.4138 | 23.0516 | 17.0604 | 19.5821 | 26.6910 | 19.1248 | 18.1537 |
| mannitol | 1 | 23.6581 | 21.8339 | 18.5137 | 19.0340 | 23.0985 | 21.1474 | 17.1646 | 20.2980 | 25.3128 | 18.3299 | 18.3832 |
|          |   | 23.0597 | 21.4194 | 18.1239 | 18.2811 | 22.6946 | 21.1759 | 17.0115 | 19.1138 | 24.1675 | 18.6536 | 17.6903 |
|          |   | 21.7865 | 21.3175 | 18.0425 | 18.7388 | 21.8179 | 21.0569 | 16.7867 | 20.4627 | 24.1910 | 18.6319 | 17.6852 |
|          | 2 | 22.1652 | 21.8928 | 17.9240 | 18.1075 | 22.0898 | 21.4011 | 16.538  | 19.4848 | 24.1948 | 19.0621 | 18.1225 |
|          |   | 21.2043 | 21.7542 | 18.4471 | 18.4762 | 21.6968 | 21.1170 | 16.9242 | 19.1340 | 24.6625 | 18.7812 | 17.7654 |
|          |   | 22.2585 | 21.3455 | 18.5044 | 18.5512 | 22.7588 | 21.2373 | 17.1875 | 19.1273 | 25.0264 | 19.1060 | 18.1050 |

|  |   |         |         |         |         |         |         |         |         |         |         |         |
|--|---|---------|---------|---------|---------|---------|---------|---------|---------|---------|---------|---------|
|  | 3 | 21.3127 | 21.3485 | 18.3480 | 18.3805 | 21.7800 | 21.0833 | 17.2081 | 18.9498 | 24.3364 | 18.6725 | 17.5479 |
|  |   | 22.2673 | 21.6331 | 18.4876 | 18.8006 | 21.7237 | 21.1166 | 17.0849 | 19.2776 | 24.5377 | 18.9303 | 17.7540 |
|  |   | 21.2497 | 21.6899 | 18.4707 | 18.8202 | 22.2075 | 21.2919 | 17.0132 | 19.1814 | 24.4406 | 18.7935 | 17.7887 |

**Table S3.** Pairwise variation ( $V_{n/n+1}$ ) analysis of 11 candidate reference genes calculated using geNorm.

|                          | control | ETH   | ABA   | CuSO <sub>4</sub> | mannitol | SA    | NaCl  | MeJA  | total |
|--------------------------|---------|-------|-------|-------------------|----------|-------|-------|-------|-------|
| <b>V<sub>2/3</sub></b>   | 0.068   | 0.061 | 0.134 | 0.162             | 0.126    | 0.088 | 0.159 | 0.127 | 0.179 |
| <b>V<sub>3/4</sub></b>   | 0.054   | 0.064 | 0.098 | 0.113             | 0.097    | 0.091 | 0.117 | 0.094 | 0.131 |
| <b>V<sub>4/5</sub></b>   | 0.054   | 0.104 | 0.099 | 0.154             | 0.086    | 0.077 | 0.107 | 0.075 | 0.117 |
| <b>V<sub>5/6</sub></b>   | 0.052   | 0.077 | 0.088 | 0.124             | 0.078    | 0.082 | 0.101 | 0.076 | 0.115 |
| <b>V<sub>6/7</sub></b>   | 0.056   | 0.106 | 0.078 | 0.097             | 0.065    | 0.096 | 0.083 | 0.080 | 0.110 |
| <b>V<sub>7/8</sub></b>   | 0.053   | 0.103 | 0.078 | 0.092             | 0.073    | 0.083 | 0.081 | 0.073 | 0.098 |
| <b>V<sub>8/9</sub></b>   | 0.052   | 0.094 | 0.077 | 0.096             | 0.077    | 0.076 | 0.096 | 0.073 | 0.085 |
| <b>V<sub>9/10</sub></b>  | 0.047   | 0.105 | 0.079 | 0.097             | 0.082    | 0.089 | 0.093 | 0.078 | 0.083 |
| <b>V<sub>10/11</sub></b> | 0.078   | 0.093 | 0.067 | 0.108             | 0.079    | 0.077 | 0.104 | 0.069 | 0.099 |

**Table S4.** Stability rank of 11 candidate genes by NormFinder.

| Rank      | control      | ETH          | ABA          | CuSO <sub>4</sub> | mannitol     | SA           | NaCl         | MeJA         | total        |
|-----------|--------------|--------------|--------------|-------------------|--------------|--------------|--------------|--------------|--------------|
| <b>1</b>  | <i>ACT</i>   | <i>EF1α</i>  | <i>UBC9</i>  | <i>GAPDH</i>      | <i>GAPDH</i> | <i>EF1α</i>  | <i>ACT</i>   | <i>GAPDH</i> | <i>TIP41</i> |
|           | 0.01         | 0.015        | 0.123        | 0.150             | 0.153        | 0.095        | 0.218        | 0.101        | 0.258        |
| <b>2</b>  | <i>EF1α</i>  | <i>ACT</i>   | <i>GAPDH</i> | <i>TIP41</i>      | <i>TUB6</i>  | <i>UBC9</i>  | <i>GAPDH</i> | <i>UBC9</i>  | <i>ACT</i>   |
|           | 0.075        | 0.070        | 0.145        | 0.201             | 0.171        | 0.126        | 0.22         | 0.172        | 0.277        |
| <b>3</b>  | <i>UBC9</i>  | <i>UBC9</i>  | <i>TIP41</i> | <i>EF1α</i>       | <i>CYP2</i>  | <i>ACT</i>   | <i>TUBA</i>  | <i>ACT</i>   | <i>EF1α</i>  |
|           | 0.091        | 0.145        | 0.213        | 0.319             | 0.182        | 0.135        | 0.271        | 0.217        | 0.317        |
| <b>4</b>  | <i>TUB6</i>  | <i>TIP41</i> | <i>EF1α</i>  | <i>UBC9</i>       | <i>ACT</i>   | <i>GAPDH</i> | <i>TIP41</i> | <i>EF1α</i>  | <i>UBC9</i>  |
|           | 0.127        | 0.218        | 0.252        | 0.376             | 0.205        | 0.149        | 0.3          | 0.218        | 0.325        |
| <b>5</b>  | <i>GAPDH</i> | <i>CYP2</i>  | <i>ACT</i>   | <i>CYP2</i>       | <i>TIP41</i> | <i>TIP41</i> | <i>CYP2</i>  | <i>TIP41</i> | <i>GAPDH</i> |
|           | 0.175        | 0.260        | 0.316        | 0.424             | 0.254        | 0.242        | 0.302        | 0.241        | 0.389        |
| <b>6</b>  | <i>YLS8</i>  | <i>YLS8</i>  | <i>PTBP</i>  | <i>ACT</i>        | <i>UBC9</i>  | <i>PTBP</i>  | <i>PTBP</i>  | <i>CYP2</i>  | <i>CYP2</i>  |
|           | 0.2          | 0.278        | 0.382        | 0.431             | 0.284        | 0.343        | 0.346        | 0.332        | 0.412        |
| <b>7</b>  | <i>CYP2</i>  | <i>SAND</i>  | <i>CYP2</i>  | <i>PTBP</i>       | <i>YLS8</i>  | <i>CYP2</i>  | <i>UBC9</i>  | <i>PTBP</i>  | <i>PTBP</i>  |
|           | 0.208        | 0.468        | 0.383        | 0.454             | 0.324        | 0.444        | 0.375        | 0.360        | 0.468        |
| <b>8</b>  | <i>PTBP</i>  | <i>TUBA</i>  | <i>TUBA</i>  | <i>SAND</i>       | <i>EF1α</i>  | <i>TUB6</i>  | <i>EF1α</i>  | <i>TUBA</i>  | <i>SAND</i>  |
|           | 0.253        | 0.596        | 0.420        | 0.504             | 0.425        | 0.480        | 0.435        | 0.427        | 0.539        |
| <b>9</b>  | <i>TUBA</i>  | <i>TUB6</i>  | <i>TUB6</i>  | <i>TUBA</i>       | <i>TUBA</i>  | <i>TUBA</i>  | <i>SAND</i>  | <i>TUB6</i>  | <i>TUBA</i>  |
|           | 0.311        | 0.636        | 0.491        | 0.577             | 0.523        | 0.544        | 0.583        | 0.458        | 0.542        |
| <b>10</b> | <i>TIP41</i> | <i>PTBP</i>  | <i>SAND</i>  | <i>TUB6</i>       | <i>PTBP</i>  | <i>YLS8</i>  | <i>YLS8</i>  | <i>YLS8</i>  | <i>YLS8</i>  |
|           | 0.312        | 0.697        | 0.497        | 0.728             | 0.528        | 0.561        | 0.689        | 0.513        | 0.580        |
| <b>11</b> | <i>SAND</i>  | <i>GAPDH</i> | <i>YLS8</i>  | <i>YLS8</i>       | <i>SAND</i>  | <i>SAND</i>  | <i>TUB6</i>  | <i>SAND</i>  | <i>TUB6</i>  |
|           | 0.654        | 0.699        | 0.518        | 0.810             | 0.597        | 0.579        | 0.786        | 0.516        | 0.743        |

**Table S5.** Stability rank of 11 candidate genes by Bestkeeper.

| Rank  | control      | ETH          | ABA          | CuSO <sub>4</sub> | mannitol     | SA           | NaCl         | MeJA         | total        |
|-------|--------------|--------------|--------------|-------------------|--------------|--------------|--------------|--------------|--------------|
| 1     | <i>EF1α</i>  | <i>GAPDH</i> | <i>TUB6</i>  | <i>TUBA</i>       | <i>TUBA</i>  | <i>TUBA</i>  | <i>YLS8</i>  | <i>TUBA</i>  | <i>TUBA</i>  |
| CV±SD | 0.45±0.08    | 2.85±0.57    | 2.15±0.56    | 1.21±0.23         | 3.26±0.60    | 2.64±0.49    | 1.42±0.32    | 2.98±0.55    | 3.94±0.74    |
| 2     | <i>UBC9</i>  | <i>TUBA</i>  | <i>TUBA</i>  | <i>TUB6</i>       | <i>EF1α</i>  | <i>TUB6</i>  | <i>UBC9</i>  | <i>TUB6</i>  | <i>CTP2</i>  |
| CV±SD | 0.50±0.11    | 3.93±0.72    | 3.08±0.57    | 1.10±0.29         | 4.05±0.71    | 1.97±0.51    | 2.95±0.67    | 2.34±0.61    | 5.00±1.15    |
| 3     | <i>ACT</i>   | <i>TIP41</i> | <i>CYP2</i>  | <i>CYP2</i>       | <i>TUB6</i>  | <i>CYP2</i>  | <i>PTBP</i>  | <i>CYP2</i>  | <i>EF1α</i>  |
| CV±SD | 0.59±0.13    | 5.22±1.21    | 2.91±0.66    | 1.30±0.30         | 4.22±1.07    | 2.59±0.59    | 2.86±0.75    | 2.74±0.63    | 6.46±1.16    |
| 4     | <i>CYP2</i>  | <i>UBC9</i>  | <i>EF1α</i>  | <i>EF1α</i>       | <i>UBC9</i>  | <i>GAPDH</i> | <i>SAND</i>  | <i>EF1α</i>  | <i>GAPDH</i> |
| CV±SD | 0.78±0.18    | 6.07±1.23    | 4.11±0.72    | 2.04±0.37         | 5.55±1.13    | 5.12±1.00    | 3.53±0.93    | 4.18±0.73    | 5.94±1.18    |
| 5     | <i>YLS8</i>  | <i>ACT</i>   | <i>GAPDH</i> | <i>GAPDH</i>      | <i>GAPDH</i> | <i>EF1α</i>  | <i>TUBA</i>  | <i>GAPDH</i> | <i>TUB6</i>  |
| CV±SD | 0.93±0.20    | 6.33±1.27    | 4.81±0.94    | 1.02±0.79         | 5.90±1.14    | 6.01±1.03    | 4.72±0.96    | 5.12±0.99    | 5.01±1.32    |
| 6     | <i>TUB6</i>  | <i>EF1α</i>  | <i>UBC9</i>  | <i>ACT</i>        | <i>CYP2</i>  | <i>TIP41</i> | <i>ACT</i>   | <i>ACT</i>   | <i>UBC9</i>  |
| CV±SD | 0.80±0.22    | 8.16±1.37    | 5.45±1.11    | 3.88±0.81         | 5.28±1.17    | 4.74±1.11    | 5.26±1.21    | 4.90±1.00    | 6.58±1.36    |
| 7     | <i>GAPDH</i> | <i>SAND</i>  | <i>TIP41</i> | <i>TIP41</i>      | <i>TIP41</i> | <i>ACT</i>   | <i>GAPDH</i> | <i>TIP41</i> | <i>TIP41</i> |
| CV±SD | 1.13±0.23    | 6.26±1.48    | 4.78±1.12    | 3.98±0.94         | 5.23±1.22    | 5.98±1.20    | 5.92±1.32    | 4.55±1.07    | 5.88±1.40    |
| 8     | <i>PTBP</i>  | <i>CYP2</i>  | <i>ACT</i>   | <i>SAND</i>       | <i>ACT</i>   | <i>UBC9</i>  | <i>TIP41</i> | <i>UBC9</i>  | <i>ACT</i>   |
| CV±SD | 1.12±0.28    | 8.03±1.72    | 6.27±1.25    | 4.85±1.16         | 7.26±1.43    | 5.96±1.21    | 5.05±1.33    | 5.90±1.20    | 6.94±1.43    |
| 9     | <i>TIP41</i> | <i>YLS8</i>  | <i>SAND</i>  | <i>UBC9</i>       | <i>YLS8</i>  | <i>PTBP</i>  | <i>CYP2</i>  | <i>SAND</i>  | <i>SAND</i>  |
| CV±SD | 1.42±0.35    | 8.95±1.76    | 5.65±1.34    | 6.18±1.25         | 7.41±1.48    | 6.08±1.44    | 5.50±1.39    | 5.33±1.27    | 6.66±1.60    |
| 10    | <i>TUBA</i>  | <i>TUB6</i>  | <i>PTBP</i>  | <i>PTBP</i>       | <i>SAND</i>  | <i>SAND</i>  | <i>EF1α</i>  | <i>PTBP</i>  | <i>YLS8</i>  |
| CV±SD | 2.09±0.40    | 9.28±2.23    | 6.12±1.44    | 5.48±1.30         | 6.86±1.61    | 7.09±1.65    | 7.92±1.62    | 5.94±1.40    | 8.88±1.79    |
| 11    | <i>SAND</i>  | <i>PTBP</i>  | <i>YLS8</i>  | <i>YLS8</i>       | <i>PTBP</i>  | <i>YLS8</i>  | <i>TUB6</i>  | <i>YLS8</i>  | <i>PTBP</i>  |
| CV±SD | 2.97±0.75    | 10.16±2.29   | 8.20±1.63    | 8.93±1.76         | 7.89±1.82    | 8.96±1.76    | 6.61±1.93    | 8.07±1.60    | 7.65±1.82    |

**Table S6.** Expression stability values of 11 candidate genes calculated using the RefFinder.

| Rank | control      | SA           | NaCl         | MeJA         | CuSO <sub>4</sub> | ETH          | ABA          | mannitol     | total        |
|------|--------------|--------------|--------------|--------------|-------------------|--------------|--------------|--------------|--------------|
| 1    | <i>EF1α</i>  | <i>EF1α</i>  | <i>GAPDH</i> | <i>GAPDH</i> | <i>GAPDH</i>      | <i>EF1α</i>  | <i>UBC9</i>  | <i>GAPDH</i> | <i>TIP41</i> |
|      | 1.565        | 1.495        | 1.934        | 1.495        | 2.115             | 1.565        | 1.565        | 1.495        | 1.627        |
| 2    | <i>ACT</i>   | <i>UBC9</i>  | <i>ACT</i>   | <i>ACT</i>   | <i>TIP41</i>      | <i>UBC9</i>  | <i>GAPDH</i> | <i>TUB6</i>  | <i>UBC9</i>  |
|      | 1.968        | 2.378        | 2.632        | 2.913        | 3.027             | 2.449        | 2.783        | 1.861        | 2.913        |
| 3    | <i>UBC9</i>  | <i>ACT</i>   | <i>CYP2</i>  | <i>UBC9</i>  | <i>UBC9</i>       | <i>ACT</i>   | <i>TIP41</i> | <i>CYP2</i>  | <i>ACT</i>   |
|      | 2.213        | 3.705        | 3.663        | 3.13         | 3.464             | 2.783        | 2.817        | 3.568        | 3.364        |
| 4    | <i>TUB6</i>  | <i>GAPDH</i> | <i>TUBA</i>  | <i>EF1α</i>  | <i>EF1α</i>       | <i>TIP41</i> | <i>EF1α</i>  | <i>ACT</i>   | <i>EF1α</i>  |
|      | 4.12         | 4            | 3.873        | 3.936        | 3.663             | 3.722        | 4            | 4.757        | 3.663        |
| 5    | <i>CYP2</i>  | <i>TUBA</i>  | <i>TIP41</i> | <i>TUBA</i>  | <i>PTBP</i>       | <i>GAPDH</i> | <i>TUB6</i>  | <i>TUBA</i>  | <i>GAPDH</i> |
|      | 5.091        | 5.196        | 4.681        | 4.601        | 4.527             | 5.609        | 4.88         | 5.196        | 4.162        |
| 6    | <i>YLS8</i>  | <i>TIP41</i> | <i>PTBP</i>  | <i>CYP2</i>  | <i>CYP2</i>       | <i>CYP2</i>  | <i>CYP2</i>  | <i>UBC9</i>  | <i>CYP2</i>  |
|      | 5.180        | 5.233        | 5.045        | 5.045        | 4.606             | 5.623        | 5.01         | 5.422        | 4.559        |
| 7    | <i>GAPDH</i> | <i>TUB6</i>  | <i>UBC9</i>  | <i>TIP41</i> | <i>TUBA</i>       | <i>TUBA</i>  | <i>TUBA</i>  | <i>EF1α</i>  | <i>TUBA</i>  |
|      | 5.916        | 5.657        | 5.118        | 5.144        | 5.196             | 5.657        | 5.264        | 5.657        | 5.335        |
| 8    | <i>PTBP</i>  | <i>CYP2</i>  | <i>YLS8</i>  | <i>TUB6</i>  | <i>ACT</i>        | <i>YLS8</i>  | <i>ACT</i>   | <i>TIP41</i> | <i>PTBP</i>  |
|      | 7.737        | 5.664        | 5.623        | 6.000        | 6.481             | 6.64         | 6.325        | 5.916        | 7.837        |
| 9    | <i>TUBA</i>  | <i>PTBP</i>  | <i>SAND</i>  | <i>PTBP</i>  | <i>TUB6</i>       | <i>SAND</i>  | <i>PTBP</i>  | <i>YLS8</i>  | <i>SAND</i>  |
|      | 9.24         | 6.64         | 7.348        | 8.149        | 6.687             | 7            | 7.841        | 6.853        | 8.485        |
| 10   | <i>TIP41</i> | <i>YLS8</i>  | <i>EF1α</i>  | <i>YLS8</i>  | <i>SAND</i>       | <i>TUB6</i>  | <i>SAND</i>  | <i>PTBP</i>  | <i>TUB6</i>  |
|      | 9.74         | 10.241       | 8.459        | 10.241       | 8                 | 9.487        | 10.215       | 10.241       | 9.032        |
| 11   | <i>SAND</i>  | <i>SAND</i>  | <i>TUB6</i>  | <i>SAND</i>  | <i>YLS8</i>       | <i>PTBP</i>  | <i>YLS8</i>  | <i>SAND</i>  | <i>YLS8</i>  |
|      | 11           | 10.741       | 11           | 10.462       | 11                | 10.741       | 10.488       | 10.741       | 9.457        |
